# Supplementary material for: DElite: a tool for integrated differential expression analysis
Source: Frontiers journal article supplement (doi:10.3389/fgene.2024.1440994), 2024-11-20
Supplement: Data_Sheet_1.pdf [file Data_Sheet_1.pdf]

# User guide to **DElite** R package

Dr. Baldazzi Davide, Dr. Doni Michele, Dr. Pezzella Stefano, Dr. Valenti Beatrice,  
Dr. Ciuffetti Maria Elena, Dr. Maestro Roberta

2024-08-24

## Abstract

DElite returns the outputs of the four tools with a single command line, thus providing a simplified way for non-expert users to perform DE analysis. Furthermore, DELite provides a statistically combined output of the four tools, and in vitro validations support the improved performance of these combination approaches for the detection of DE genes in small datasets. Finally, DELite offers comprehensive and well-documented plots and tables at each stage of the analysis, thus facilitating result interpretation. Although DELite has been designed with the intention of being accessible to users without extensive expertise in bioinformatics or statistics, the underlying code is open source and structured in such a way that it can be customized by advanced users to meet their specific requirements. DELite package version: 1.1

## INTRODUCTION

**DElite** is an R package that leverages the capabilities of four commonly used tools for Differential Expression (DE) Analysis.

1. DESeq2 (Love et al. 2014)
2. edgeR (Robinson et al. 2010)
3. Limma-Voom (Ritchie et al. 2015; Law et al. 2014)
4. dearseq (Gauthier et al. 2020)

**DElite** returns the outputs of the four tools with a single command line, providing a simplified way for non-expert users to cross-examine different approaches of DE analysis. To help pinpointing the most reliable observations, **DElite** also provides the intersection (Max-P method) of the results from the four tools and a statistically combined output using one of the following methods according to user choice.

1. Bonferroni-Holm's Method (Holm 1979)
2. Fisher's Method (Fisher 1925)
3. Lancaster's Method (Inverted Chi-Square) (Lancaster 1961)
4. Stouffer's Method (Stouffer et al. 1949)
5. Tippett's Method (Tippett 1931)
6. Wilkinson's Method (Wilkinson 1951)

## USAGE

The **DElite** package provides a simplified way for non-expert user to perform DE analysis. Users can load the DElite package as follow:

```
library(DElite)
```

Users can run a complete analysis with **DElite** by specifying just three required arguments: counts data, metadata, and the condition to test for differentially expressed genes:

```
DElite(counts_file, metadata_file, condition)
```

The **REQUIRED arguments** that the user must specify are:

**counts\_file** Path to un-normalized counts file. Rows refer to genes while columns refer to samples. Header row is required and first column must include features names.

**metadata\_file** Path to metadata file. One of the column name must match with the condition to test for DE genes. First column must include sample names.

**condition** Condition to test for DE genes. Column name in the metadata file to test for DE genes. Reference level is determined by alphabetical order.

The **OPTIONAL arguments** that the user can specify are:

**path** Path to the directory where the DElite output folder will be generated. DElite will create a directory with the following naming schema: **DElite\_yy-mm-dd\_rndstring**

Default is R current working directory

**pvalue** Significance Threshold for the p-value corrected for multiple testing. Applied in the results filtering phase.

Default value is 0.05

**logfc** Significance Threshold for the absolute value of the log2 fold change. Applied in the results filtering phase.

Default value is 1

**lowcounts** Low counts filtering method. One of “rowsums”, “var” and “fbexp”. The “rowsums” method filters genes based on the sum of their counts across all samples. The “var” method filters genes based on the variance of their counts distribution. The “fbexp” method utilizes the **filterByExpr** function from the edgeR package.

Default is “fbexp”

**fbexp** Threshold value to filter out low counts via **filterByExpr** function. Applied only when **lowcounts="fbexp"**

Default value is 10

**rowsums** Threshold value to filter out low counts via rowsums function. Applied only when **lowcounts="rowsums"**

Default value is 10

**var** Threshold value to filter out low counts via variance filter. User submitted value has to be interpreted as the top quantile percentage retained. Applied only when **lowcounts="var"**

Default value is 0.25

**wilcoxon** Boolean, either T or F (TRUE or FALSE). Run the Wilcoxon rank-sum test if TRUE.

Default is F

**combine** P-value combination method applied by DELite during the meta-analysis. Options are: “bonferroni”, “fisher”, “lancastrer”, “stouffer”, “tippett”, “wilkinson”. DELite will always perform in addition to the method chosen the “max” method.

Default is “lancastrer”

**dearseq\_mode** dearseq analysis approach, choose between “permutation” or “asymptotic”. “permutation” mode is suggested when number of samples is less than 10.

Default “asymptotic”

To test and explore DELite, please run the following commands. A sample dataset is already included for your convenience.

```
counts_file = system.file("extdata", "counts_pruned.csv", package="DELite", mustWork=TRUE)
metadata_file = system.file("extdata", "metadata.csv", package="DELite", mustWork=TRUE)
condition = "condition"
DELite::DELite(counts_file, metadata_file, condition)
```

## TUTORIAL

Here we provide an example analysis. For your convenience a sample data is already included.

### 1) Specify the profile expression matrix

The counts\_file indicates the path (that is a string of characters used to uniquely identify a location in a directory structure) of the raw counts file to be analyzed with DELite.

```
counts_file <- "/path/to/your/counts_file.csv"
```

**(!) Tips & Tricks** If you don't know how to obtain the path of your file, right click on it, press properties and copy the string right after “Path” or “Parent folder” by selecting it and pressing the keyboard keys “Ctrl” and “C”. On the other hand, if you are using RStudio you can navigate through the directories in the “Files” panel. Once you reached the folder where your chosen file is, click the Gear icon “More”, and select “Copy folder path to clipboard”.

Here we provide an example using an expression profile matrix already included in the package.

```
counts_file <- system.file("extdata", "counts_pruned.csv", package="DELite", mustWork=TRUE)
head(read.csv(counts_file, header=TRUE, sep=",", check.names=FALSE, row.names=1))
```

|       | sample1 | sample2 | sample3 | sample4 | sample11 | sample12 | sample13 | sample14 |
|-------|---------|---------|---------|---------|----------|----------|----------|----------|
| ## g1 | 593     | 1001    | 1215    | 445     | 4876     | 4221     | 3080     | 25383    |
| ## g2 | 73      | 486     | 34      | 39      | 135      | 27       | 122      | 195      |
| ## g3 | 11      | 36      | 14      | 36      | 104      | 98       | 12       | 53       |
| ## g4 | 2       | 8       | 28      | 3       | 11       | 4        | 0        | 7        |
| ## g5 | 141     | 244     | 254     | 71      | 441      | 768      | 1541     | 1114     |
| ## g6 | 16      | 22      | 12      | 14      | 66       | 100      | 94       | 38       |

As you can see, your expression profile matrix must include feature names in the first column and sample names in the first row.

## 2) Specify the metadata

Specify the metadata as you previously did for the expression profile matrix.

```
metadata_file <- "/path/to/your/metadata_file.csv"
```

Here we provide an example of metadata included in the package.

```
metadata_file <- system.file("extdata", "metadata.csv", package="DElite", mustWork=TRUE)
head(read.csv(metadata_file, header=TRUE, sep=" ", check.names=FALSE, row.names=1))
```

```
##          condition depth.factor
## sample1          A    0.7729433
## sample2          A    0.8217464
## sample3          A    0.8019498
## sample4          A    0.7258261
## sample11         B    0.8981939
## sample12         B    1.1341414
```

As you can see, metadata must have an header and must report sample names in their first column.

## 3) Run DElite

Once set up your `counts_file` and the `metadata_file` the only thing left to do is to select the condition to test for differential expression. It must be the name of one of the columns in the metadata file.

```
condition <- "your_testing_condition"
```

In the metadata included in **DElite**, the testing column condition is called "condition".

```
condition <- "condition"
```

To test and run **DElite** analysis simply type the following:

```
DElite::DElite(counts_file, metadata_file, condition)
```

In order to personalize the analysis, the user can change the optional arguments previously described.

The most basic script in R to run **DElite** should look like this:

```
counts_file <- "/path/to/your/counts_file.csv"
metadata_file <- "/path/to/your/metadata_file.csv"
condition <- "your_testing_condition"
DElite::DElite(counts_file, metadata_file, condition)
```

- Delite\_YYYY-MM-DD\_rndstring
- DEGs\_filtered\_DESeq2.csv
- DEGs\_filtered\_Delite\_lancaster.csv
- DEGs\_filtered\_Delite\_max.csv
- DEGs\_filtered\_dearseq.csv
- DEGs\_filtered\_edgeR.csv
- DEGs\_filtered\_limma.csv
- DEGs\_meta\_analysis\_Delite\_lancaster.csv
- DEGs\_meta\_analysis\_Delite\_max.csv
- DEGs\_unfiltered\_DESeq2.csv
- DEGs\_unfiltered\_Delite\_lancaster.csv
- DEGs\_unfiltered\_Delite\_max.csv
- DEGs\_unfiltered\_dearseq.csv
- DEGs\_unfiltered\_edgeR.csv
- DEGs\_unfiltered\_limma.csv
- plots
  - DESeq2\_Cook\_distance.png
  - DESeq2\_MeanSD\_ntd.png
  - DESeq2\_MeanSD\_vsd.png
  - DESeq2\_dispersion\_estimates.png
  - DESeq2\_distance\_heatmap.png
  - DESeq2\_heatmap\_counts.png
  - DESeq2\_heatmap\_top\_50.png
  - DESeq2\_heatmap\_top\_500.png
  - DESeq2\_normalized\_counts.png
  - DESeq2\_plot\_counts.png
  - DESeq2\_principal\_component\_analysis\_PC12.png
  - DESeq2\_principal\_component\_analysis\_PC13.png
  - DESeq2\_principal\_component\_analysis\_PC23.png
  - DESeq2\_pval\_adj.png
  - DESeq2\_volcano\_plot.png
  - Delite\_lancaster\_heatmap\_top\_50.png
  - Delite\_lancaster\_heatmap\_top\_500.png
  - Delite\_lancaster\_pval\_adj.png
  - Delite\_lancaster\_volcano\_plot.png
  - Delite\_max\_heatmap\_top\_50.png
  - Delite\_max\_heatmap\_top\_500.png
  - Delite\_max\_pval\_adj.png
  - Delite\_max\_volcano\_plot.png
  - Delite\_venn\_diagram.png
  - dearseq\_heatmap\_top\_50.png
  - dearseq\_heatmap\_top\_500.png
  - dearseq\_plots.png
  - dearseq\_pval\_adj.png
  - dearseq\_volcano\_plot.png
  - edgeR\_BCVplot.png
  - edgeR\_MDS\_plot.png
  - edgeR\_MD\_plot.png
  - edgeR\_heatmap\_top\_50.png
  - edgeR\_heatmap\_top\_500.png
  - edgeR\_library\_size.png
  - edgeR\_pval\_adj.png
  - edgeR\_quasi\_likelihood\_dispersion.png
  - edgeR\_unfiltered\_vs\_filtered.png
  - edgeR\_unnormalized\_vs\_normalized.png
  - edgeR\_volcano\_plot.png
  - limma\_MD\_plot.png
  - limma\_heatmap\_top\_50.png
  - limma\_heatmap\_top\_500.png
  - limma\_mean\_variance\_trend.png
  - limma\_pval\_adj.png
  - limma\_volcano\_plot.png
- report.pdf

5

Here some of the plots generated by the DELite analysis:

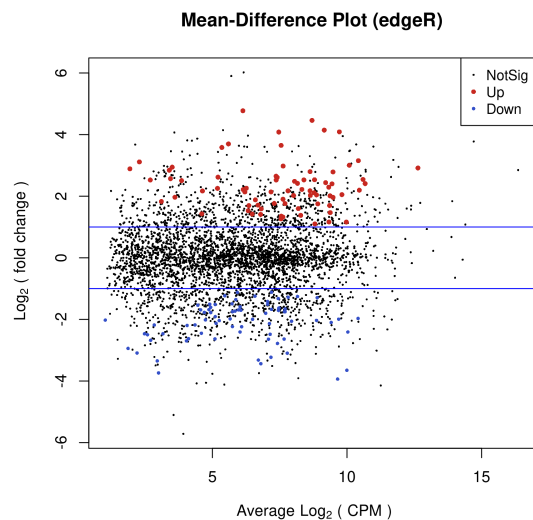

Figure 2: MD plot. Red and blue dots indicate the genes emerged as differentially expressed in the dataset. Red dots resulted as up-regulated while blue dots emerged as down-regulated. Horizontal lines mark the chosen threshold for the  $|\log_2 (FC)|$

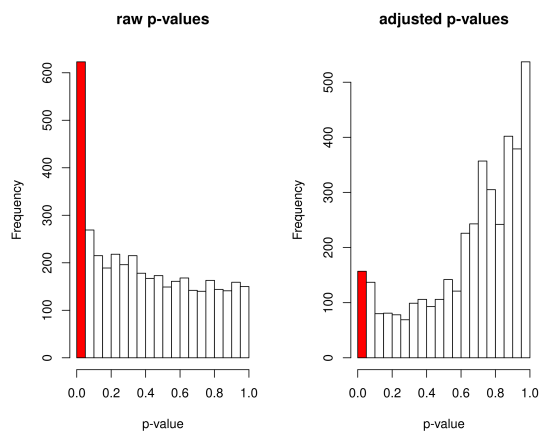

Figure 3: Histograms representing the distribution of p-values (left plot) and adjusted p-values (right plot) respectively. Probability values below the user selected threshold are highlighted in red.

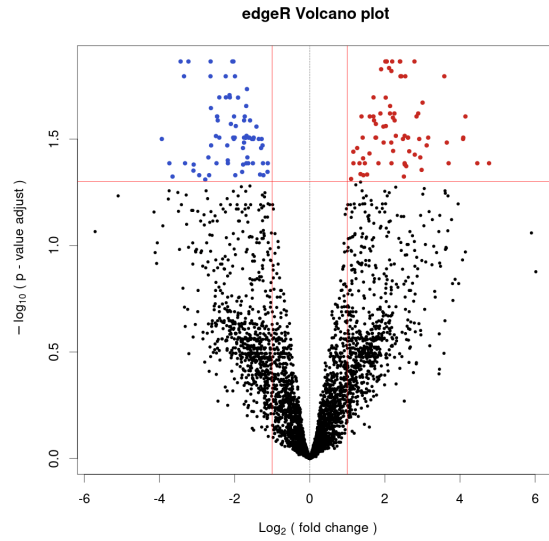

Figure 4: This volcano plot shows genes as the relation between their significance  $\log_{10}(\text{p-value adjust})$  and  $\log_2(\text{FC})$ . Red and blue data points represent genes that passed the filtering criteria. Red genes emerged up-regulated given the tested condition while blue genes emerged as down-regulated.

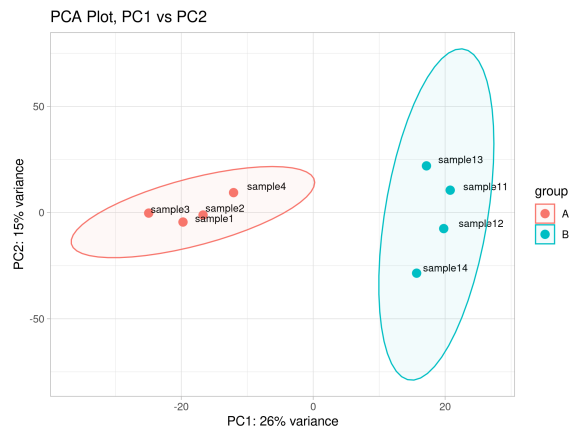

Figure 5: Principal Component Analysis plot representing the Principal components 1 and 2. Samples are labeled according to the condition they belong to.

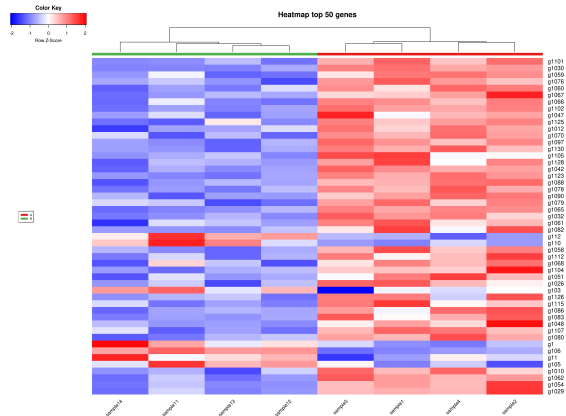

Figure 6: Heatmap representing expression levels of the top 50 DE features.

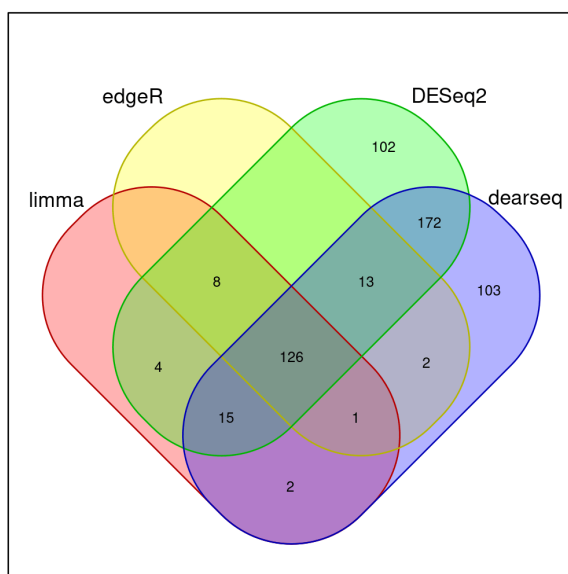

Figure 7: Venn diagram representing the intersection of the results produced by the tools DESeq2, edgeR, limma and dearseq.



## Session Info

```
## R version 4.1.2 (2021-11-01)
## Platform: x86_64-pc-linux-gnu (64-bit)
## Running under: Ubuntu 22.04.3 LTS
##
## Matrix products: default
## BLAS:   /usr/lib/x86_64-linux-gnu/openblas-pthread/libblas.so.3
## LAPACK: /usr/lib/x86_64-linux-gnu/openblas-pthread/libopenblas-p-r0.3.20.so
##
## locale:
##  [1] LC_CTYPE=en_US.UTF-8      LC_NUMERIC=C
##  [3] LC_TIME=en_US.UTF-8      LC_COLLATE=en_US.UTF-8
##  [5] LC_MONETARY=en_US.UTF-8  LC_MESSAGES=en_US.UTF-8
##  [7] LC_PAPER=en_US.UTF-8     LC_NAME=C
##  [9] LC_ADDRESS=C             LC_TELEPHONE=C
## [11] LC_MEASUREMENT=en_US.UTF-8 LC_IDENTIFICATION=C
##
## attached base packages:
## [1] stats      graphics  grDevices  utils      datasets  methods    base
##
## other attached packages:
## [1] DElite_1.1      ggplot2_3.5.1  hexbin_1.28.2  dearseq_1.6.0
##
## loaded via a namespace (and not attached):
##  [1] pillar_1.9.0      compiler_4.1.2    tools_4.1.2
##  [4] statmod_1.5.0     digest_0.6.35     lattice_0.20-45
##  [7] evaluate_0.23     lifecycle_1.0.4   tibble_3.2.1
## [10] gtable_0.3.5      viridisLite_0.4.2 pkgconfig_2.0.3
## [13] rlang_1.1.3       Matrix_1.5-3      DBI_1.1.3
## [16] cli_3.6.2         rstudioapi_0.14   patchwork_1.2.0.9000
## [19] yaml_2.3.8        parallel_4.1.2    xfun_0.43
## [22] fastmap_1.1.1     withr_3.0.0       dplyr_1.1.4
## [25] knitr_1.46        mitools_2.4       generics_0.1.3
## [28] vctrs_0.6.5       grid_4.1.2        tidyselect_1.2.1
## [31] glue_1.7.0        R6_2.5.1          fansi_1.0.6
## [34] pbapply_1.7-0     survival_3.4-0    rmarkdown_2.26
## [37] magrittr_2.0.3    splines_4.1.2     scales_1.3.0
## [40] htmltools_0.5.8.1 matrixStats_0.63.0 colorspace_2.1-0
## [43] utf8_1.2.4        KernSmooth_2.23-20 survey_4.1-1
## [46] munsell_0.5.1
```
