# Supplementary material for: DElite: a tool for integrated differential expression analysis
Source: Front Genet. 2024 Nov 20;15:1440994. doi: 10.3389/fgene.2024.1440994 (PMC11614847; doi:10.3389/fgene.2024.1440994)
Supplement: Supplementary file 7 [file Table1.xlsx]

## Sheet: 1A_Cohort Size 3
Supplementary Table 1A. DE analysis in the synthetic small dataset (Cohort Size = 3; padj ≤ 0.05, |log(FC)| ≥ 1). The number of upregulated (UP) and downregulated (DOWN) genes are indicated.
Dataset	Expected DE Genes	Method	UP Expected	UP Detected	UP Detected TRUE	DOWN Expected	DOWN Detected	DOWN Detected TRUE
Dataset #1	0	dearseq	0	1202	0	0	1182	0
simdataset_0_0.5_10_0_0	0	DESeq2	0	240	0	0	234	0
simdataset_0_0.5_10_0_0	0	edgeR	0	0	0	0	0	0
simdataset_0_0.5_10_0_0	0	limma	0	0	0	0	0	0
		Lancaster	0	2293	0	0	2251	0
simdataset_0_0.5_10_0_0	0	Fisher	0	2537	0	0	2475	0
simdataset_0_0.5_10_0_0	0	Stouffer	0	3225	0	0	3171	0
simdataset_0_0.5_10_0_0	0	Bonferroni	0	859	0	0	842	0
simdataset_0_0.5_10_0_0	0	Tippett	0	859	0	0	843	0
simdataset_0_0.5_10_0_0	0	Wilkinson	0	859	0	0	843	0
simdataset_0_0.5_10_0_0	0	Max-P	0	0	0	0	0	0
simdataset_0_0.5_10_0_0	0	Wilcoxon Rank-Sum Test	0	0	0	0	0	0
Dataset #2	12500	dearseq	6212	3582	2343	6284	3448	2191
simdataset_1250_0.5_10_0_0	12500	DESeq2	6212	2277	1817	6284	1976	1514
simdataset_1250_0.5_10_0_0	12500	edgeR	6212	217	210	6284	128	126
simdataset_1250_0.5_10_0_0	12500	limma	6212	297	289	6284	173	168
simdataset_1250_0.5_10_0_0	12500	Lancaster	6212	5070	2830	6284	4778	2567
simdataset_1250_0.5_10_0_0	12500	Fisher	6212	5333	2874	6284	5046	2618
simdataset_1250_0.5_10_0_0	12500	Stouffer	6212	6043	3001	6284	5736	2747
simdataset_1250_0.5_10_0_0	12500	Bonferroni	6212	2963	2111	6284	2860	1964
simdataset_1250_0.5_10_0_0	12500	Tippett	6212	2966	2112	6284	2862	1966
simdataset_1250_0.5_10_0_0	12500	Wilkinson	6212	2963	2111	6284	2860	1964
simdataset_1250_0.5_10_0_0	12500	Max-P	6212	160	157	6284	80	79
simdataset_1250_0.5_10_0_0	12500	Wilcoxon Rank-Sum Test	6212	0	0	6284	0	0
Dataset #3	12500	dearseq	11171	5219	4248	1325	1649	16
simdataset_1250_1_10_0_0	12500	DESeq2	11171	3445	3084	1325	558	6
simdataset_1250_1_10_0_0	12500	edgeR	11171	386	383	1325	6	0
simdataset_1250_1_10_0_0	12500	limma	11171	525	520	1325	10	0
simdataset_1250_1_10_0_0	12500	Lancaster	11171	6873	5083	1325	2846	32
simdataset_1250_1_10_0_0	12500	Fisher	11171	7113	5181	1325	3087	35
simdataset_1250_1_10_0_0	12500	Stouffer	11171	7829	5419	1325	3783	43
simdataset_1250_1_10_0_0	12500	Bonferroni	11171	4434	3766	1325	1139	10
simdataset_1250_1_10_0_0	12500	Tippett	11171	4435	3766	1325	1139	10
simdataset_1250_1_10_0_0	12500	Wilkinson	11171	4435	3767	1325	1138	10
simdataset_1250_1_10_0_0	12500	Max-P	11171	346	345	1325	6	0
simdataset_1250_1_10_0_0	12500	Wilcoxon Rank-Sum Test	11171	0	0	1325	0	0
Dataset #4	40000	dearseq	19141	8859	7865	20839	8766	7527
simdataset_4000_0.5_10_0_0	39996	DESeq2	19141	7250	6742	20839	6444	5852
simdataset_4000_0.5_10_0_0	39996	edgeR	19141	3685	3600	20839	3091	2973
simdataset_4000_0.5_10_0_0	39996	limma	19141	3816	3718	20839	3139	3018
simdataset_4000_0.5_10_0_0	39996	Lancaster	19141	10764	9098	20839	10529	8529
simdataset_4000_0.5_10_0_0	39996	Fisher	19141	11090	9256	20839	10848	8701
simdataset_4000_0.5_10_0_0	39996	Stouffer	19141	11848	9616	20839	11602	9028
simdataset_4000_0.5_10_0_0	39996	Bonferroni	19141	7849	7134	20839	7672	6800
simdataset_4000_0.5_10_0_0	39996	Tippett	19141	7851	7136	20839	7675	6801
simdataset_4000_0.5_10_0_0	39996	Wilkinson	19141	7849	7134	20839	7672	6800
simdataset_4000_0.5_10_0_0	39996	Max-P	19141	3263	3206	20839	2658	2588
simdataset_4000_0.5_10_0_0	39996	Wilcoxon Rank-Sum Test	19141	0	0	20839	0	0
Dataset #5	40000	dearseq	32063	10950	10506	7919	3331	85
simdataset_4000_1_10_0_0	39997	DESeq2	32063	8090	7897	7919	1527	40
simdataset_4000_1_10_0_0	39997	edgeR	32063	2472	2454	7919	96	5
simdataset_4000_1_10_0_0	39997	limma	32063	2756	2741	7919	124	6
simdataset_4000_1_10_0_0	39997	Lancaster	32063	13177	12389	7919	4882	159
simdataset_4000_1_10_0_0	39997	Fisher	32063	13510	12643	7919	5164	176
simdataset_4000_1_10_0_0	39997	Stouffer	32063	14309	13237	7919	5896	222
simdataset_4000_1_10_0_0	39997	Bonferroni	32063	9518	9204	7919	2457	64
simdataset_4000_1_10_0_0	39997	Tippett	32063	9522	9208	7919	2459	64
simdataset_4000_1_10_0_0	39997	Wilkinson	32063	9521	9207	7919	2458	64
simdataset_4000_1_10_0_0	39997	Max-P	32063	2177	2166	7919	67	4
simdataset_4000_1_10_0_0	39997	Wilcoxon Rank-Sum Test	32063	0	0	7919	0	0
Dataset #6	0	dearseq	0	999	0	0	1014	0
simdataset_0_0.5_10_1_0	0	DESeq2	0	349	0	0	333	0
simdataset_0_0.5_10_1_0	0	edgeR	0	0	0	0	0	0
simdataset_0_0.5_10_1_0	0	limma	0	0	0	0	0	0
simdataset_0_0.5_10_1_0	0	Lancaster	0	3086	0	0	3048	0
simdataset_0_0.5_10_1_0	0	Fisher	0	3656	0	0	3610	0
simdataset_0_0.5_10_1_0	0	Stouffer	0	5544	0	0	5487	0
simdataset_0_0.5_10_1_0	0	Bonferroni	0	726	0	0	752	0
simdataset_0_0.5_10_1_0	0	Tippett	0	726	0	0	752	0
simdataset_0_0.5_10_1_0	0	Wilkinson	0	716	0	0	729	0
simdataset_0_0.5_10_1_0	0	Max-P	0	0	0	0	0	0
simdataset_0_0.5_10_1_0	0	Wilcoxon Rank-Sum Test	0	0	0	0	0	0
Dataset #7	12500	dearseq	6131	3015	1917	6366	2857	1761
simdataset_1250_0.5_10_1_0	12498	DESeq2	6131	2325	1576	6366	2128	1404
simdataset_1250_0.5_10_1_0	12498	edgeR	6131	0	0	6366	0	0
simdataset_1250_0.5_10_1_0	12498	limma	6131	0	0	6366	0	0
simdataset_1250_0.5_10_1_0	12498	Lancaster	6131	5592	2519	6366	5454	2359
simdataset_1250_0.5_10_1_0	12498	Fisher	6131	6136	2530	6366	6007	2366
simdataset_1250_0.5_10_1_0	12498	Stouffer	6131	7905	2666	6366	7858	2521
simdataset_1250_0.5_10_1_0	12498	Bonferroni	6131	2616	1745	6366	2439	1596
simdataset_1250_0.5_10_1_0	12498	Tippett	6131	2618	1745	6366	2439	1596
simdataset_1250_0.5_10_1_0	12498	Wilkinson	6131	2578	1733	6366	2413	1587
simdataset_1250_0.5_10_1_0	12498	Max-P	6131	0	0	6366	0	0
simdataset_1250_0.5_10_1_0	12498	Wilcoxon Rank-Sum Test	6131	0	0	6366	0	0
Dataset #8	0	dearseq	0	1103	0	0	1131	0
simdataset_0_0.5_10_0_1	0	DESeq2	0	212	0	0	199	0
simdataset_0_0.5_10_0_1	0	edgeR	0	0	0	0	0	0
simdataset_0_0.5_10_0_1	0	limma	0	0	0	0	0	0
simdataset_0_0.5_10_0_1	0	Lancaster	0	2363	0	0	2420	0
simdataset_0_0.5_10_0_1	0	Fisher	0	2676	0	0	2778	0
simdataset_0_0.5_10_0_1	0	Stouffer	0	3655	0	0	3710	0
simdataset_0_0.5_10_0_1	0	Bonferroni	0	784	0	0	814	0
simdataset_0_0.5_10_0_1	0	Tippett	0	784	0	0	814	0
simdataset_0_0.5_10_0_1	0	Wilkinson	0	783	0	0	810	0
simdataset_0_0.5_10_0_1	0	Max-P	0	0	0	0	0	0
simdataset_0_0.5_10_0_1	0	Wilcoxon Rank-Sum Test	0	0	0	0	0	0
Dataset #9	12500	dearseq	6130	3530	2303	6360	3347	2102
simdataset_1250_0.5_10_0_1	12498	DESeq2	6130	2132	1704	6360	1883	1470
simdataset_1250_0.5_10_0_1	12498	edgeR	6130	25	25	6360	31	29
simdataset_1250_0.5_10_0_1	12498	limma	6130	102	100	6360	87	83
simdataset_1250_0.5_10_0_1	12498	Lancaster	6130	5235	2773	6360	5019	2571
simdataset_1250_0.5_10_0_1	12498	Fisher	6130	5566	2812	6360	5376	2634
simdataset_1250_0.5_10_0_1	12498	Stouffer	6130	6538	2939	6360	6375	2759
simdataset_1250_0.5_10_0_1	12498	Bonferroni	6130	2947	2077	6360	2806	1915
simdataset_1250_0.5_10_0_1	12498	Tippett	6130	2947	2077	6360	2807	1916
simdataset_1250_0.5_10_0_1	12498	Wilkinson	6130	2946	2079	6360	2806	1915
simdataset_1250_0.5_10_0_1	12498	Max-P	6130	18	18	6360	19	19
simdataset_1250_0.5_10_0_1	12498	Wilcoxon Rank-Sum Test	6130	0	0	6360	0	0

## Sheet: 1B_Cohort Size 10
Supplementary Table 1B. DE analysis in the synthetic medium dataset (Cohort Size = 10; padj ≤ 0.05, |log(FC)| ≥ 1). The number of upregulated (UP) and downregulated (DOWN) genes are indicated.
Dataset	Expected DE Genes	Method	UP Expected	UP Detected	UP Detected TRUE	DOWN Expected	DOWN Detected	DOWN Detected TRUE
Dataset #1	0	dearseq	0	0	0	0	0	0
simdataset_0_0.5_10_0_0	0	DESeq2	5	0	0	9	0	0
simdataset_0_0.5_10_0_0	0	edgeR	2	0	0	0	0	0
simdataset_0_0.5_10_0_0	0	limma	0	0	0	0	0	0
		Lancaster	425	0	0	365	0	0
simdataset_0_0.5_10_0_0	0	Fisher	484	0	0	421	0	0
simdataset_0_0.5_10_0_0	0	Stouffer	651	0	0	586	0	0
simdataset_0_0.5_10_0_0	0	Bonferroni	4	0	0	4	0	0
simdataset_0_0.5_10_0_0	0	Tippett	4	0	0	4	0	0
simdataset_0_0.5_10_0_0	0	Wilkinson	4	0	0	4	0	0
simdataset_0_0.5_10_0_0	0	Max-P	0	0	0	0	0	0
simdataset_0_0.5_10_0_0	0	Wilcoxon Rank-Sum Test	0	0	0	0	0	0
Dataset #2	12500	dearseq	2532	2473	6249	556	554	6248
simdataset_1250_0.5_10_0_0	12500	DESeq2	3021	2902	6249	2727	2602	6248
simdataset_1250_0.5_10_0_0	12500	edgeR	2755	2703	6249	2521	2457	6248
simdataset_1250_0.5_10_0_0	12500	limma	2703	2627	6249	2459	2388	6248
simdataset_1250_0.5_10_0_0	12500	Lancaster	3614	3135	6249	3180	2780	6248
simdataset_1250_0.5_10_0_0	12500	Fisher	3680	3156	6249	3250	2798	6248
simdataset_1250_0.5_10_0_0	12500	Stouffer	3816	3176	6249	3409	2823	6248
simdataset_1250_0.5_10_0_0	12500	Bonferroni	2776	2716	6249	2520	2453	6248
simdataset_1250_0.5_10_0_0	12500	Tippett	2776	2716	6249	2520	2453	6248
simdataset_1250_0.5_10_0_0	12500	Wilkinson	2776	2716	6249	2520	2453	6248
simdataset_1250_0.5_10_0_0	12500	Max-P	2282	2273	6249	419	417	6248
simdataset_1250_0.5_10_0_0	12500	Wilcoxon Rank-Sum Test	2356	2341	6249	2208	2185	6248
Dataset #3	12500	dearseq	4799	4746	12036	2	0	464
simdataset_1250_1_10_0_0	12500	DESeq2	5235	5160	12036	227	1	464
simdataset_1250_1_10_0_0	12500	edgeR	4929	4904	12036	88	0	464
simdataset_1250_1_10_0_0	12500	limma	4830	4788	12036	107	0	464
simdataset_1250_1_10_0_0	12500	Lancaster	5999	5683	12036	603	2	464
simdataset_1250_1_10_0_0	12500	Fisher	6073	5722	12036	658	2	464
simdataset_1250_1_10_0_0	12500	Stouffer	6212	5777	12036	807	3	464
simdataset_1250_1_10_0_0	12500	Bonferroni	4946	4914	12036	94	0	464
simdataset_1250_1_10_0_0	12500	Tippett	4946	4914	12036	94	0	464
simdataset_1250_1_10_0_0	12500	Wilkinson	4946	4914	12036	94	0	464
simdataset_1250_1_10_0_0	12500	Max-P	4489	4479	12036	2	0	464
simdataset_1250_1_10_0_0	12500	Wilcoxon Rank-Sum Test	4250	4244	12036	26	0	464
Dataset #4	40000	dearseq	8963	8859	19562	4345	4341	20434
simdataset_4000_0.5_10_0_0	39996	DESeq2	9741	9554	19562	8995	8801	20434
simdataset_4000_0.5_10_0_0	39996	edgeR	9316	9204	19562	8693	8577	20434
simdataset_4000_0.5_10_0_0	39996	limma	9087	8952	19562	8560	8420	20434
simdataset_4000_0.5_10_0_0	39996	Lancaster	10329	9914	19562	9500	9107	20434
simdataset_4000_0.5_10_0_0	39996	Fisher	10412	9958	19562	9573	9146	20434
simdataset_4000_0.5_10_0_0	39996	Stouffer	10548	10034	19562	9705	9205	20434
simdataset_4000_0.5_10_0_0	39996	Bonferroni	9195	9095	19562	8459	8378	20434
simdataset_4000_0.5_10_0_0	39996	Tippett	9198	9098	19562	8461	8380	20434
simdataset_4000_0.5_10_0_0	39996	Wilkinson	9198	9098	19562	8461	8380	20434
simdataset_4000_0.5_10_0_0	39996	Max-P	8624	8571	19562	4227	4222	20434
simdataset_4000_0.5_10_0_0	39996	Wilcoxon Rank-Sum Test	8674	8598	19562	8158	8092	20434
Dataset #5	40000	dearseq	11433	11398	35036	125	0	4961
simdataset_4000_1_10_0_0	39997	DESeq2	11923	11876	35036	1124	3	4961
simdataset_4000_1_10_0_0	39997	edgeR	11736	11706	35036	708	2	4961
simdataset_4000_1_10_0_0	39997	limma	11578	11536	35036	828	2	4961
simdataset_4000_1_10_0_0	39997	Lancaster	12913	12758	35036	1495	11	4961
simdataset_4000_1_10_0_0	39997	Fisher	12980	12811	35036	1574	11	4961
simdataset_4000_1_10_0_0	39997	Stouffer	13129	12930	35036	1710	23	4961
simdataset_4000_1_10_0_0	39997	Bonferroni	11385	11361	35036	607	2	4961
simdataset_4000_1_10_0_0	39997	Tippett	11397	11373	35036	608	2	4961
simdataset_4000_1_10_0_0	39997	Wilkinson	11397	11373	35036	608	2	4961
simdataset_4000_1_10_0_0	39997	Max-P	10835	10820	35036	112	0	4961
simdataset_4000_1_10_0_0	39997	Wilcoxon Rank-Sum Test	10736	10725	35036	450	0	4961
Dataset #6	0	dearseq	0	0	0	0	0	0
simdataset_0_0.5_10_1_0	0	DESeq2	214	0	0	182	0	0
simdataset_0_0.5_10_1_0	0	edgeR	0	0	0	0	0	0
simdataset_0_0.5_10_1_0	0	limma	0	0	0	0	0	0
simdataset_0_0.5_10_1_0	0	Lancaster	2599	0	0	2277	0	0
simdataset_0_0.5_10_1_0	0	Fisher	2941	0	0	2577	0	0
simdataset_0_0.5_10_1_0	0	Stouffer	3612	0	0	3135	0	0
simdataset_0_0.5_10_1_0	0	Bonferroni	22	0	0	14	0	0
simdataset_0_0.5_10_1_0	0	Tippett	22	0	0	14	0	0
simdataset_0_0.5_10_1_0	0	Wilkinson	22	0	0	14	0	0
simdataset_0_0.5_10_1_0	0	Max-P	0	0	0	0	0	0
simdataset_0_0.5_10_1_0	0	Wilcoxon Rank-Sum Test	0	0	0	0	0	0
Dataset #7	12500	dearseq	1604	1581	6069	601	598	6430
simdataset_1250_0.5_10_1_0	12498	DESeq2	3680	2583	6069	3497	2336	6430
simdataset_1250_0.5_10_1_0	12498	edgeR	2208	2026	6069	2082	1858	6430
simdataset_1250_0.5_10_1_0	12498	limma	2040	2010	6069	1849	1813	6430
simdataset_1250_0.5_10_1_0	12498	Lancaster	5673	3096	6069	5129	2686	6430
simdataset_1250_0.5_10_1_0	12498	Fisher	5971	3130	6069	5367	2706	6430
simdataset_1250_0.5_10_1_0	12498	Stouffer	6525	3175	6069	5780	2737	6430
simdataset_1250_0.5_10_1_0	12498	Bonferroni	2755	2395	6069	2524	2121	6430
simdataset_1250_0.5_10_1_0	12498	Tippett	2756	2395	6069	2524	2121	6430
simdataset_1250_0.5_10_1_0	12498	Wilkinson	2756	2395	6069	2524	2121	6430
simdataset_1250_0.5_10_1_0	12498	Max-P	1277	1271	6069	527	527	6430
simdataset_1250_0.5_10_1_0	12498	Wilcoxon Rank-Sum Test	1655	1635	6069	1528	1510	6430
Dataset #8	0	dearseq	0	0	0	0	0	0
simdataset_0_0.5_10_0_1	0	DESeq2	11	0	0	12	0	0
simdataset_0_0.5_10_0_1	0	edgeR	0	0	0	0	0	0
simdataset_0_0.5_10_0_1	0	limma	0	0	0	0	0	0
simdataset_0_0.5_10_0_1	0	Lancaster	547	0	0	391	0	0
simdataset_0_0.5_10_0_1	0	Fisher	635	0	0	482	0	0
simdataset_0_0.5_10_0_1	0	Stouffer	828	0	0	689	0	0
simdataset_0_0.5_10_0_1	0	Bonferroni	0	0	0	6	0	0
simdataset_0_0.5_10_0_1	0	Tippett	0	0	0	6	0	0
simdataset_0_0.5_10_0_1	0	Wilkinson	0	0	0	6	0	0
simdataset_0_0.5_10_0_1	0	Max-P	0	0	0	0	0	0
simdataset_0_0.5_10_0_1	0	Wilcoxon Rank-Sum Test	0	0	0	0	0	0
Dataset #9	12500	dearseq	2344	2306	6257	431	430	6241
simdataset_1250_0.5_10_0_1	12498	DESeq2	2990	2836	6257	2770	2592	6241
simdataset_1250_0.5_10_0_1	12498	edgeR	2695	2631	6257	2515	2440	6241
simdataset_1250_0.5_10_0_1	12498	limma	2610	2547	6257	2432	2370	6241
simdataset_1250_0.5_10_0_1	12498	Lancaster	3757	3121	6257	3352	2800	6241
simdataset_1250_0.5_10_0_1	12498	Fisher	3818	3134	6257	3439	2817	6241
simdataset_1250_0.5_10_0_1	12498	Stouffer	4016	3177	6257	3620	2845	6241
simdataset_1250_0.5_10_0_1	12498	Bonferroni	2739	2669	6257	2539	2456	6241
simdataset_1250_0.5_10_0_1	12498	Tippett	2740	2670	6257	2540	2456	6241
simdataset_1250_0.5_10_0_1	12498	Wilkinson	2740	2670	6257	2540	2456	6241
simdataset_1250_0.5_10_0_1	12498	Max-P	2134	2123	6257	306	306	6241
simdataset_1250_0.5_10_0_1	12498	Wilcoxon Rank-Sum Test	2256	2235	6257	2158	2138	6241

## Sheet: 1C_Cohort Size 100
Supplementary Table 1C. DE analysis in the synthetic large dataset (Cohort Size = 100; padj ≤ 0.05, |log(FC)| ≥ 1). The number of upregulated (UP) and downregulated (DOWN) genes are indicated.
Dataset	Expected DE Genes	Method	UP Expected	UP Detected	UP Detected TRUE	DOWN Expected	DOWN Detected	DOWN Detected TRUE
Dataset Large	20000	dearseq	5970	5912	11936	3740	3707	8064
simdataset_0_0.5_10_0_0	0	DESeq2	6171	6106	11936	3840	3755	8064
simdataset_0_0.5_10_0_0	0	edgeR	6206	6120	11936	3854	3739	8064
simdataset_0_0.5_10_0_0	0	limma	5992	5986	11936	3719	3705	8064
		Lancaster	5849	5844	11936	2925	2921	8064
simdataset_0_0.5_10_0_0	0	Fisher	5849	5844	11936	2925	2921	8064
simdataset_0_0.5_10_0_0	0	Stouffer	5848	5844	11936	2925	2921	8064
simdataset_0_0.5_10_0_0	0	Bonferroni	5848	5843	11936	2925	2921	8064
simdataset_0_0.5_10_0_0	0	Tippett	5848	5843	11936	2925	2921	8064
simdataset_0_0.5_10_0_0	0	Wilkinson	5848	5843	11936	2925	2921	8064
simdataset_0_0.5_10_0_0	0	Max-P	5587	5586	11936	2845	2844	8064
simdataset_0_0.5_10_0_0	0	Wilcoxon Rank-Sum Test	5980	5921	11936	3720	3697	8064
